# Supplementary material for: “A Hippo Out of Water”: A Qualitative Inquiry of How Cancer Survivors’ Experienced In-Person and Remote-Delivered Mind-Body Therapies
Source: PubMed Central journal article supplement — Glob Adv Integr Med Health. 2023 Oct 28;12:27536130231207807. doi: 10.1177/27536130231207807 (PMC10614178; doi:10.1177/27536130231207807), 2023-10-28
Supplement: sj-pdf-2-gam-10.1177_27536130231207807.pdf [file sj-pdf-2-gam-10.1177_27536130231207807.pdf]

**Table 1**  
*Participant Characteristics*

| Characteristics                              | Value                 |
|----------------------------------------------|-----------------------|
|                                              | Mean (SD) [range]     |
| <b>Age (years)</b>                           | 70.6 (8.15) [53 – 76] |
| <b>Gender</b>                                |                       |
| Female                                       | 9                     |
| Male                                         | 4                     |
| Non-Binary                                   | 0                     |
| <b>Marital Status</b>                        | N (%)                 |
| Single                                       | 1 (7)                 |
| Married                                      | 9 (64)                |
| Committed Relationship                       | 1 (7)                 |
| Divorced                                     | 2 (14)                |
| Widower                                      | 1 (7)                 |
| <b>Income Source</b>                         |                       |
| Employment                                   | 8 (57)                |
| Pension/Retirement                           | 5 (35)                |
| <b>Education</b>                             |                       |
| Elementary to Highschool                     | 3 (21)                |
| Trade                                        | 1 (7)                 |
| Post-Secondary<br>(College/diploma)          | 4 (28)                |
| Post-Secondary<br>(University/undergraduate) | 5 (35)                |
| <b>Cancer Diagnosis</b>                      |                       |
| Melanoma                                     | 1 (7)                 |
| Breast                                       | 7 (50)                |
| Prostate                                     | 3 (21)                |
| Thyroid                                      | 1 (7)                 |
| Lung                                         | 1 (7)                 |
| Uterus/Cervical                              | 1 (7)                 |
| <b>Treatment Type</b>                        |                       |
| Surgery                                      | 9 (64)                |
| Chemotherapy                                 | 2 (14)                |
| Radiation                                    | 5 (35)                |

**Table 2**  
**Thematic Structure and Selected Quotations**

| Themes:                                      |        |                                                                                                                                                                                                                                                                                                                                                                                                                                             |
|----------------------------------------------|--------|---------------------------------------------------------------------------------------------------------------------------------------------------------------------------------------------------------------------------------------------------------------------------------------------------------------------------------------------------------------------------------------------------------------------------------------------|
| Theme 1                                      |        | Attending to personal needs                                                                                                                                                                                                                                                                                                                                                                                                                 |
| Sub-theme                                    |        | Benefits for coping with COVID-19-related distress                                                                                                                                                                                                                                                                                                                                                                                          |
| Theme 2                                      |        | Functional, interpersonal, and COVID19-related challenges                                                                                                                                                                                                                                                                                                                                                                                   |
| Theme 3                                      |        | Unique engagement styles based on mode of delivery                                                                                                                                                                                                                                                                                                                                                                                          |
| Theme 4                                      |        | Ease of transitioning to remote delivery                                                                                                                                                                                                                                                                                                                                                                                                    |
| Sub-theme                                    |        | Preferred mode of delivery (online or in-person)                                                                                                                                                                                                                                                                                                                                                                                            |
| Participant Quotations on Preferred Delivery |        |                                                                                                                                                                                                                                                                                                                                                                                                                                             |
| Group Affiliation                            | Gender | Quotation                                                                                                                                                                                                                                                                                                                                                                                                                                   |
| TCQ (Hybrid)                                 | Male   | <i>There is something about in person that is way better than -- just an example, right now, the church and stuff, they're done on Zoom. I'm tired of Zoom, that's the same thing there. It's just -- it's not the same as in person, it just is not, no. That's what I feel. And it was the same thing with the tai chi stuff</i>                                                                                                          |
| TCQ (Hybrid)                                 | Female | <i>If the online had clarity in everything I probably would have preferred that to in person because, I mean, I'm looking around the room thinking, okay, what type of cancer did that person have, and it's not right, you're not focused on what you're doing</i>                                                                                                                                                                         |
| TCQ (Hybrid)                                 | Female | <i>Yeah, sure. And I get that like, with tai chi especially for someone -- well, everyone in these classes are pretty all brand new to tai chi myself included if I joined in, and there'd be lots of times where I would just feel I would rather be in my own space even with the thought of eyes on me or whatever, whatever it might be and just being able to do it that way</i>                                                       |
| TCQ (Online)                                 | Female | <i>Yeah, like the -- I had been really looking forward to going to classes and meeting new people and stuff, but -- and meeting people that are actually going through the same thing as I was, like, you could meet people, but it was -- would have been nice to see other people that are dealing with cancer too. That was a part I kind of had but like I said, you have to do -- deal with what's out here right now</i>              |
| MBCR (Online)                                | Female | <i>For me, I mean, it's better to be around people and to do it in class. But I mean, you have to take right now what the world is in, but I still think it'd be beneficial to take it. So I think if you could be -- you take it with a group. I mean if everybody's sitting in one room, always better I think. For some people, that isn't easy though. Maybe it's more beneficial for some people to probably be doing it over Zoom</i> |

MBCR  
(Online)

Female

*I'm probably trying to practice a little bit more of mindfulness on a daily basis, because my husband is on oxygen 24/7 for COPD. And we've been staying, I mean, social life is nil, so that's a little bit harder. I've probably been able to use it more on a daily basis than any other time. Not really. I felt that he was a pretty high stress person anyways, but was over a year with no more stress for sure*

MBCR (In-  
person)

Female

*I mean, that's just being around a group of people not knowing each other to start with. I mean for people that take very much to themselves. Some people can't talk very open. I have to say I kept just to myself and what's going on in my life. The two instructors were able to do their job I think and they could pick the people out and the different personalities, and I saw that there were some people I have to say, they come once and they didn't come back, and I don't think it was anything to do with the class. I think it was probably more their health in general. They weren't probably getting treatment or not. There was a lot of bad days, good days, sort of thing*

---
